# Supplementary material for: Clickable poly-l-lysine for the formation of biorecognition surfaces
Source: Royal Society of Chemistry journal article supplement (doi:10.1039/c9ra08714a), 2019-01-01
Supplement: c9ra08714a1.pdf [file c9ra08714a1.pdf]

## Supporting Information

### Clickable Poly-L-Lysine for the Formation of Biorecognition Surfaces

Daniele Di Iorio, Almudena Marti, Sander Koeman and Jurriaan Huskens\*

Molecular NanoFabrication group, MESA+ Institute for Nanotechnology, University of Twente, Enschede, The Netherlands

#### Synthesis of PLL-OEG-Tz and PLL-OEG-DBCO

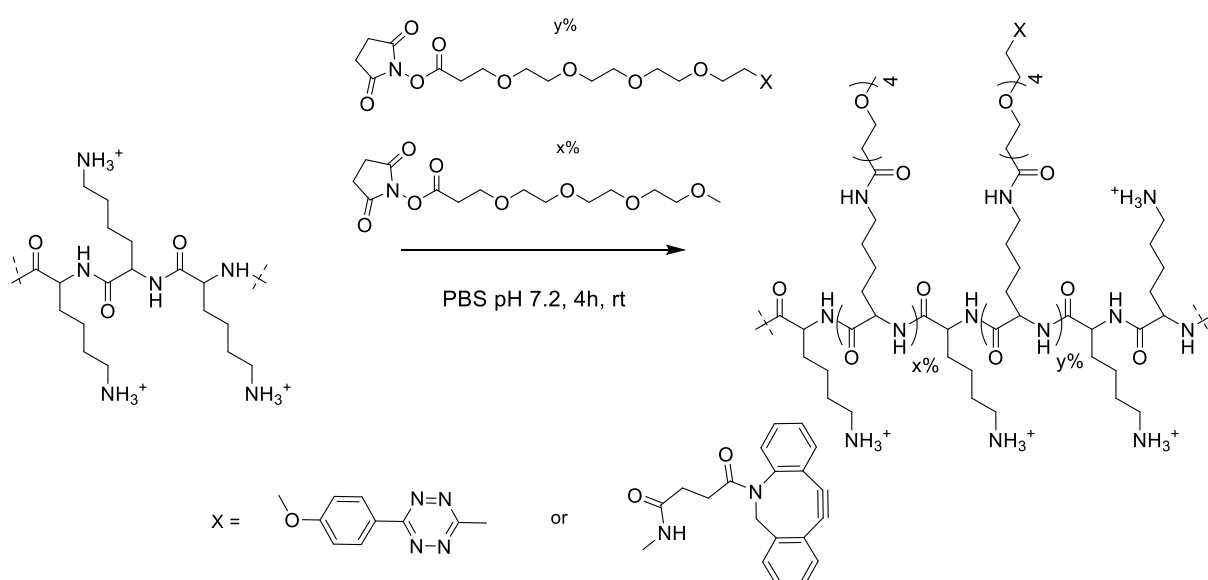

**Scheme S1.** Synthesis of PLL-OEG-Tz and PLL-OEG-DBCO. PLL is reacted with desired relative ratios of either Tz-OEG<sub>4</sub>-NHS or DBCO-OEG<sub>4</sub>-NHS, and methyl-OEG<sub>4</sub>-NHS ester to give the final modified PLL with the desired degrees of functionalization.

The overall grafting ratio (the percentage of the OEG and OEG-Tz chains) was determined by adapting a previously reported procedure.<sup>1</sup> The grafting densities of tetrazine moieties (y%) were calculated by eqn 1:

$$\% \text{ functionalization} = \frac{\text{integral of one Tz peak}}{\text{integral of free lysine} + \text{integral of coupled lysine}} \times 100 \quad (1)$$

The grafted densities of DBCO moieties (y%) were calculated instead by eqn 2:

$$\% \text{ of functionalization} = \frac{(\text{integral of DBCO peak})/4}{\text{integral of free lysine} + \text{integral of coupled lysine}} \times 100 \quad (2)$$

**Table S1.** Degrees of functionalization of modified PLLs calculated by NMR.

| Modified PLL                                 | Free lysine % | Coupled lysine % | Tz/DBCO % |
|----------------------------------------------|---------------|------------------|-----------|
| PLL-OEG                                      | 72.0          | 28.0             | 0         |
| PLL-OEG <sub>31.7</sub> -Tz <sub>0.5</sub>   | 67.8          | 32.2             | 0.5       |
| PLL-OEG <sub>26.0</sub> -Tz <sub>4.9</sub>   | 69.1          | 30.9             | 4.9       |
| PLL-OEG <sub>27.3</sub> -Tz <sub>14.6</sub>  | 58.1          | 41.9             | 14.6      |
| PLL-OEG <sub>24.5</sub> -DBCO <sub>6.7</sub> | 68.8          | 31.2             | 6.7       |

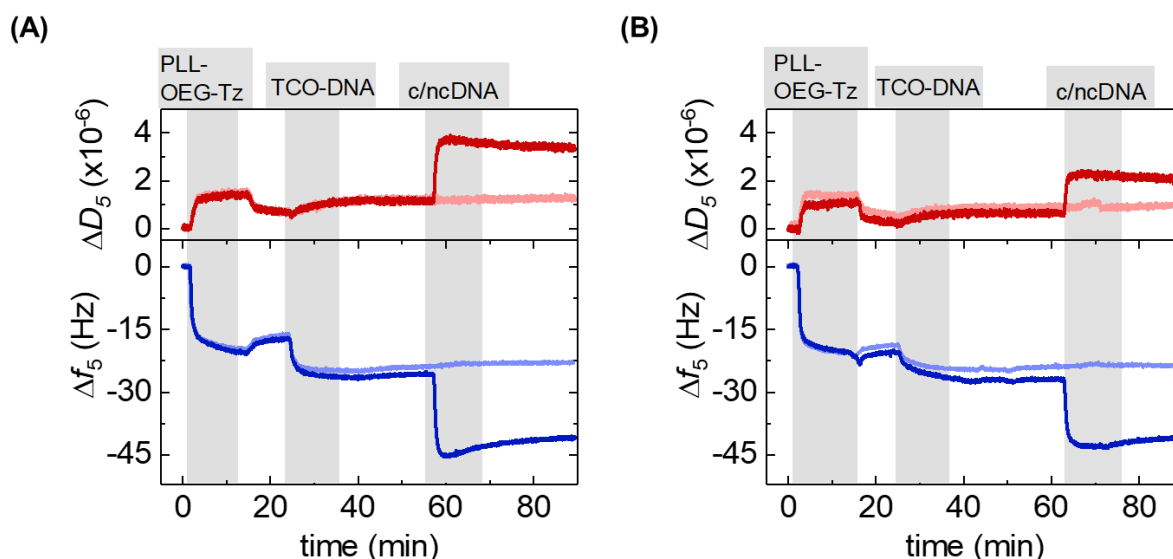

**Figure S1.** QCM-D sensograms of the assembly of PLL-OEG(26.0)-Tz(4.9) (0.1 mg/mL in PBS) on silicon dioxide (A) and gold (B) surfaces, followed by TCO-DNA (1  $\mu$ M in PBS) and cDNA (1  $\mu$ M in PBS). The frequency shift ( $\Delta f_5$ ) is represented by the blue lines and the dissipation signal ( $D_5$ ) by the red lines. The dark-colored lines represent traces using cDNA, while the light-colored ones indicate the use of ncDNA as a control. All adsorption steps are shown in grey vertical bars, while the washing steps with PBS are in white.

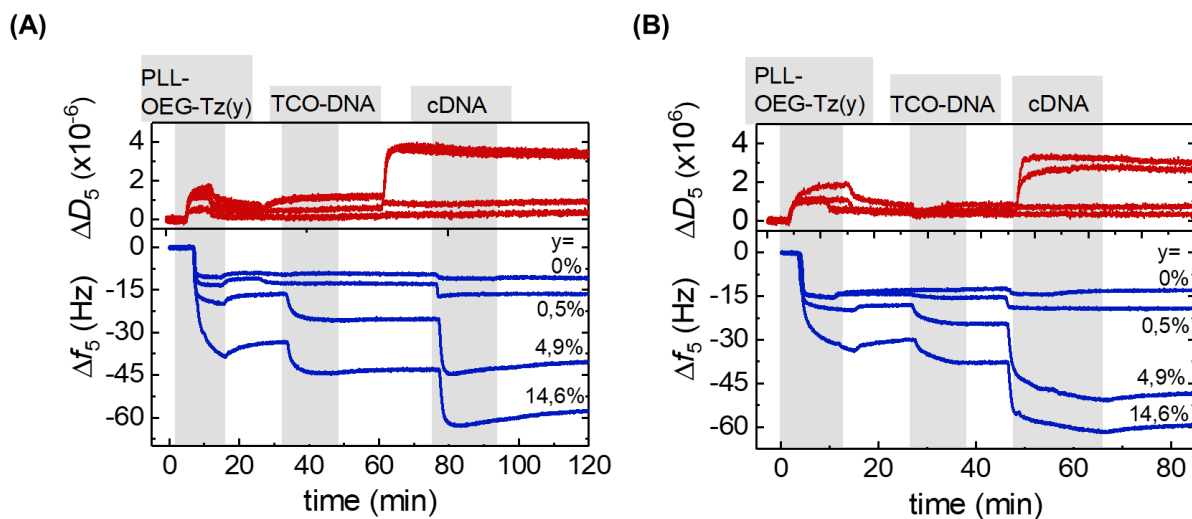

**Figure S2.** QCM-D sensograms of the assembly of PLL-OEG-Tz functionalized with varying percentages of Tz ( $y = 0, 0.5, 4.9$  and  $14.6\%$ ), followed by coupling with TCO-DNA and adsorption of cDNA, for both  $\text{SiO}_2$  (A) gold (B) substrates. The frequency shift ( $\Delta f_5$ ) is represented by the blue lines and the dissipation signal ( $\Delta D_5$ ) by the red lines.

## Comparison between SiO<sub>2</sub> and gold substrates

Some differences in the adsorption steps were, however, observed for the two types of substrates. First of all, the TCO-DNA steps appeared to be larger on SiO<sub>2</sub> surfaces compared to gold. Moreover, adsorption of cDNA appeared to be larger on the gold surface indicating a higher hybridization efficiency and/or a difference in the degree of hydration. At the same time, some dissipation changes were observed for the TCO-DNA adsorption steps, whereas smaller increments were observed on gold substrates compared to SiO<sub>2</sub>. These observations may suggest that differences in the substrate charge occur after activation which might influence the adsorption of TCO-DNA and cDNA in subsequent steps and/or the hydration of the layer. As a consequence, the apparent hybridization efficiency, defined as the ratio of the frequency shifts induced by cDNA and TCO-DNA, was higher for gold surfaces compared to silicon dioxide. By taking into account the different lengths of the TCO-DNA (15 nts) and cDNA (36 nts), hybridization efficiencies (uncorrected for possible differences and changes in hydration) of 130% and 65% were obtained for gold and silicon dioxide surfaces, respectively. Different DNA lengths as well as the formation of a DNA duplex can cause a change in the degree of hydration, which is detected by QCM.<sup>2,3</sup>

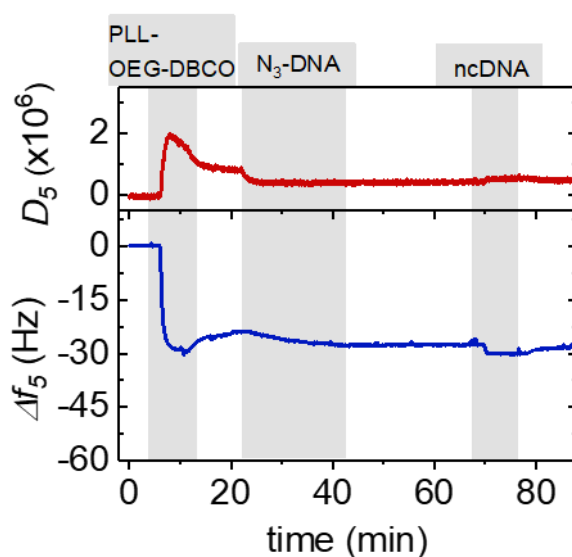

**Figure S3.** QCM-D sensograms of the assembly of PLL-OEG-DBCO(6.7) (0.1 mg/mL in PBS) on silicon dioxide surfaces, followed by N<sub>3</sub>-DNA (1  $\mu$ M in PBS) and ncDNA (1  $\mu$ M in PBS). The frequency shift ( $\Delta f_5$ ) is represented by the blue line and the dissipation signal ( $\Delta D_5$ ) by the red line. All adsorption steps are shown in grey vertical bars, while the washing steps with PBS are shown in white.

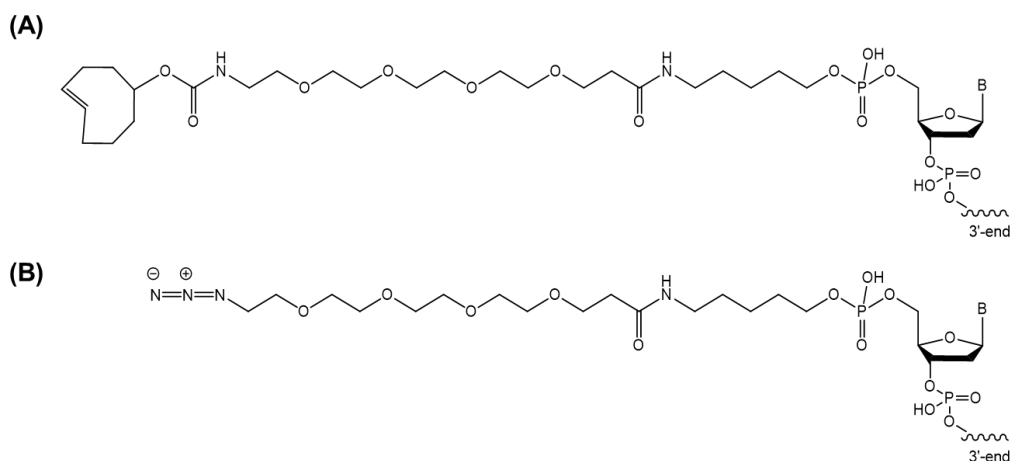

**Figure S4.** Chemical structures of the TCOD linker (A) and of the azido linker (B) used in this work for the modified DNA sequences. The exact sequences are described in the Materials.

### Quantification of DNA

The surface coverage of DNA was calculated by using the following equation:

$$Q_{total} = \frac{2nFAD_0^{1/2}c_0^+}{\pi^{1/2}} t^{1/2} + Q_{dl} + nFA\Gamma_0 \quad (4)$$

Where  $n$  is the number of electrons in the electrode reaction ( $n=1$ ),  $F$  is the Faraday constant (96485 C/equivalent),  $A$  is the electrode area (0.044 cm<sup>2</sup>),  $Q_{dl}$  is the capacitive charge (C),  $nFA\Gamma_0$  is the charge produced by the adsorbed RuHex and  $\Gamma_0$  is the amount of RuHex confined on the electrode surface (mol/cm<sup>2</sup>). The intercept at  $t = 0$  is the sum of the capacitive charge ( $Q_{dl}$ ) and the surface excess terms ( $nFA\Gamma_0$ ).

$$Q_{total} = Q_{dl} + nFA\Gamma_0 \quad (5)$$

To achieve a much more indicative view of DNA surface density, a meaningful conversion is necessary.  $\Gamma_{DNA}$ , the probe coverage in molecules/cm<sup>2</sup>, can be written as in Eq. 5, where  $m$  is the number of base pairs in the DNA,  $z$  is the charge of the redox molecules ( $z=3$ ) and  $N_A$  is Avogadro's number.

$$\Gamma_{DNA} = \Gamma_0 \left( \frac{z}{m} \right) N_A \quad (6)$$

Substituting Eq. 5 into Eq. 6:

$$\Gamma_{DNA} = \frac{Q_{total} - Q_{dl}}{nFA} \left( \frac{z}{m} \right) N_A \quad (7)$$

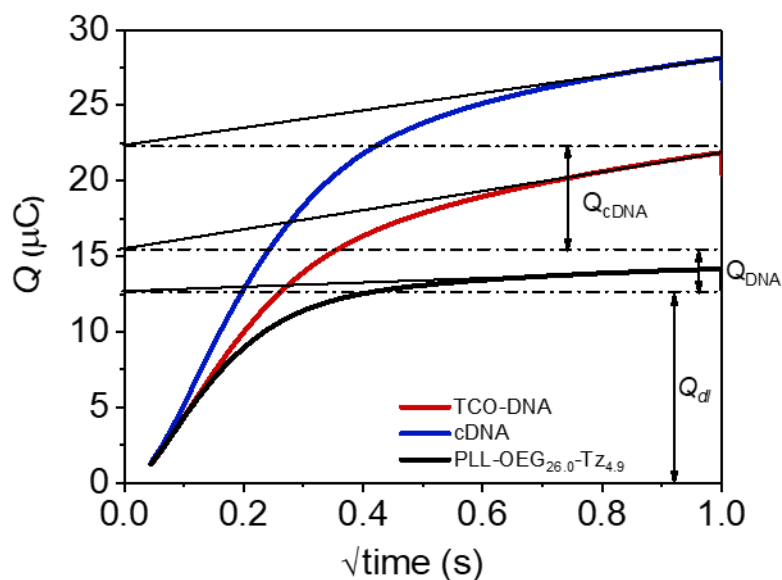

**Figure S5.** CV measurements showing a typical DNA density calculation. The represented Figure is the same as Figure 3.5, with additional indications for the calculation of DNA densities, where  $Q_{dl}$  represents the capacitive charge,  $Q_{DNA}$  is the measured charge for TCO-DNA and  $Q_{cDNA}$  is the charge measured upon addition of cDNA.

## Supporting References

1. J. Movilli, A. Rozzi, R. Ricciardi, R. Corradini and J. Huskens, *Bioconjugate Chemistry*, 2018, **29**, 4110-4118.
2. C. Larsson, M. Rodahl and F. Höök, *Analytical Chemistry*, 2003, **75**, 5080-5087.
3. X. Su, Y.-J. Wu and W. Knoll, *Biosensors and Bioelectronics*, 2005, **21**, 719-726.
